# Supplementary material for: The clinical relevance of a polygenic risk score for type 2 diabetes mellitus in the Korean population
Source: PubMed Central journal article supplement (PMC10923897; doi:10.1038/s41598-024-55313-0), 2024-03-08
Supplement: 41598_2024_55313_MOESM1_ESM.pdf [file 41598_2024_55313_MOESM1_ESM.pdf]

# **Supplementary Materials**

**for**

## **The Clinical relevance of Polygenic Risk Scores to Type 2 Diabetes Mellitus in Korean Population**

Na Yeon Kim<sup>1</sup>, Haekyung Lee<sup>2</sup>, Sehee Kim<sup>3</sup>, Ye-Jee Kim<sup>3</sup>, Hyunsuk Lee<sup>4,5</sup>, Junhyeong Lee<sup>1</sup>,

Soo Heon Kwak<sup>4</sup>, Seunggeun Lee<sup>1,\*</sup>

### **Corresponding author**

Seunggeun Lee

Graduate School of Data Science

Seoul National University, Seoul, South Korea

[lee7801@snu.ac.kr](mailto:lee7801@snu.ac.kr)

# Supplementary Figures

Supplementary Fig. S1 Manhattan plot of meta-analysis of East Asian T2DM

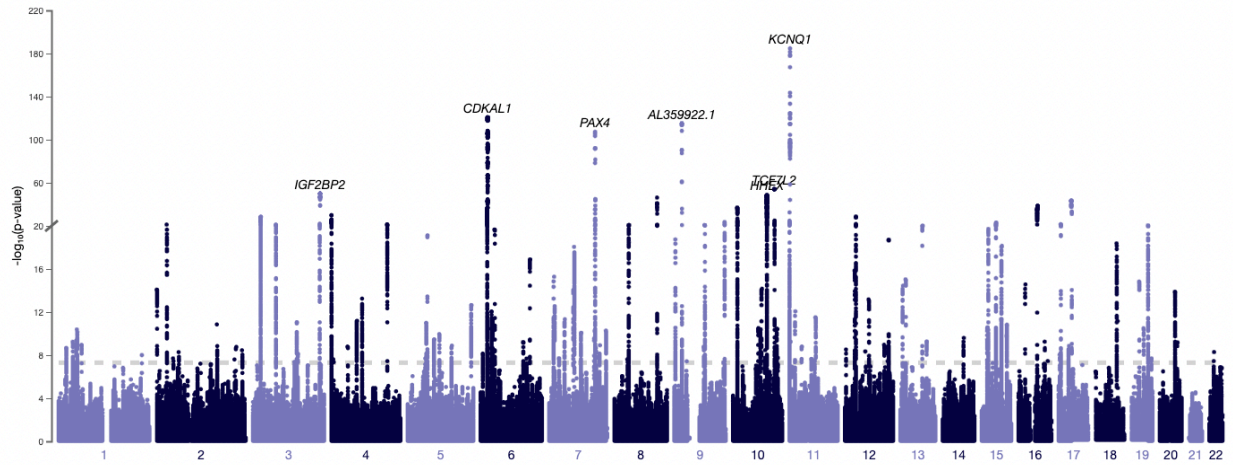

**Supplementary Fig. S2** KoGES Ansan and Ansung: Kaplan-Meier curve for cumulative prevalence of T2DM by PRS group

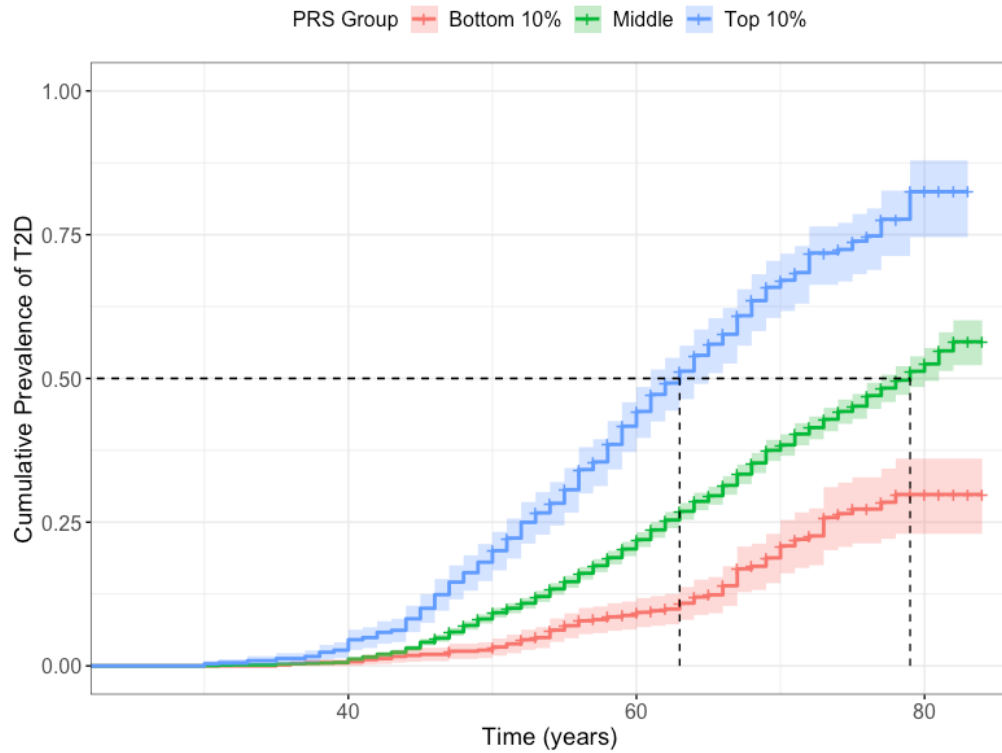

Each shaded area represents 95% confidence band for each curve. Each dash line indicates median age-at-T2DM diagnosis for each PRS group.

**Supplementary Fig. S3** UKBB East Asian validation: Kaplan-Meier curve for cumulative prevalence of T2DM by PRS Group

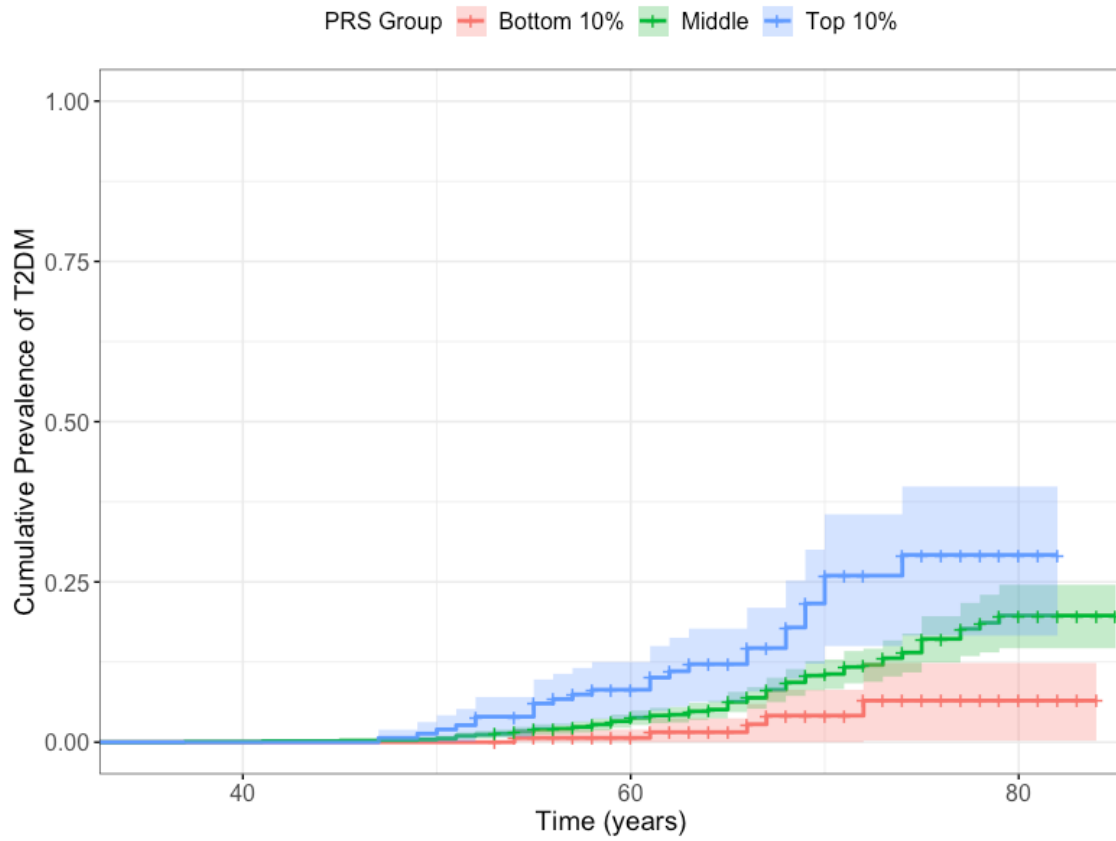

Each shaded area represents 95% confidence band for each curve.

**Supplementary Fig. S4** Retrograde trajectory of HOMA-IR and HOMA-B. A. Diabetes (HOMA-IR) B. Non-Diabetes (HOMA-IR) C. Diabetes (HOMA-B) D. Non-Diabetes (HOMA-B)

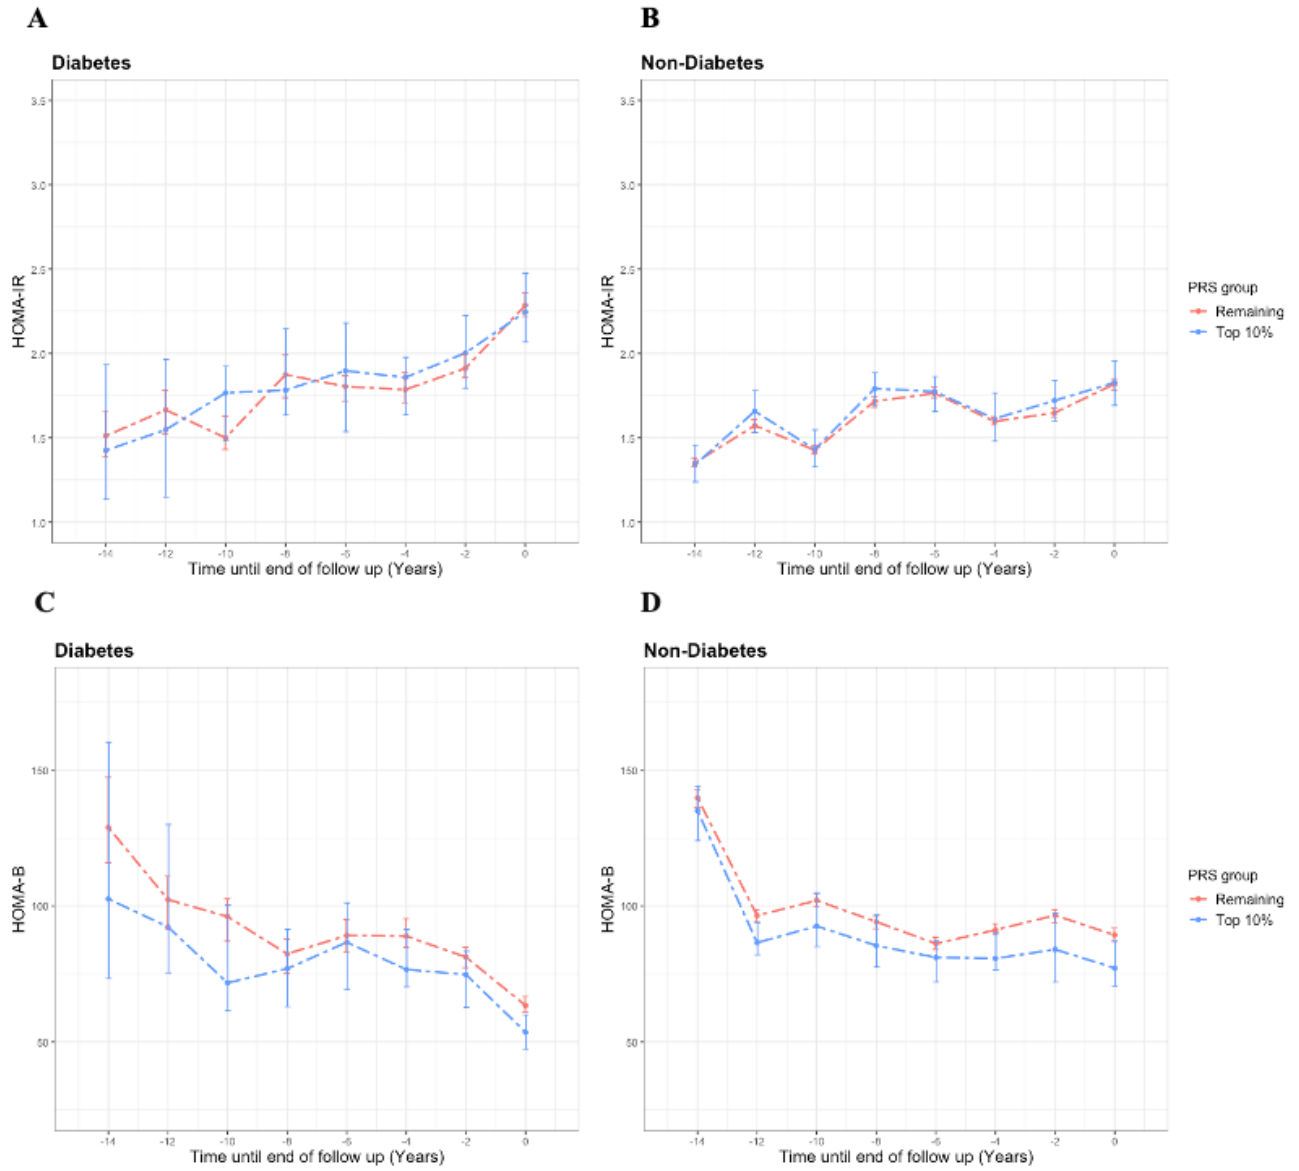

Each bar represents 95% confidence interval at each time point.

**Supplementary Fig. S5** Novel diabetic subgroup characteristics

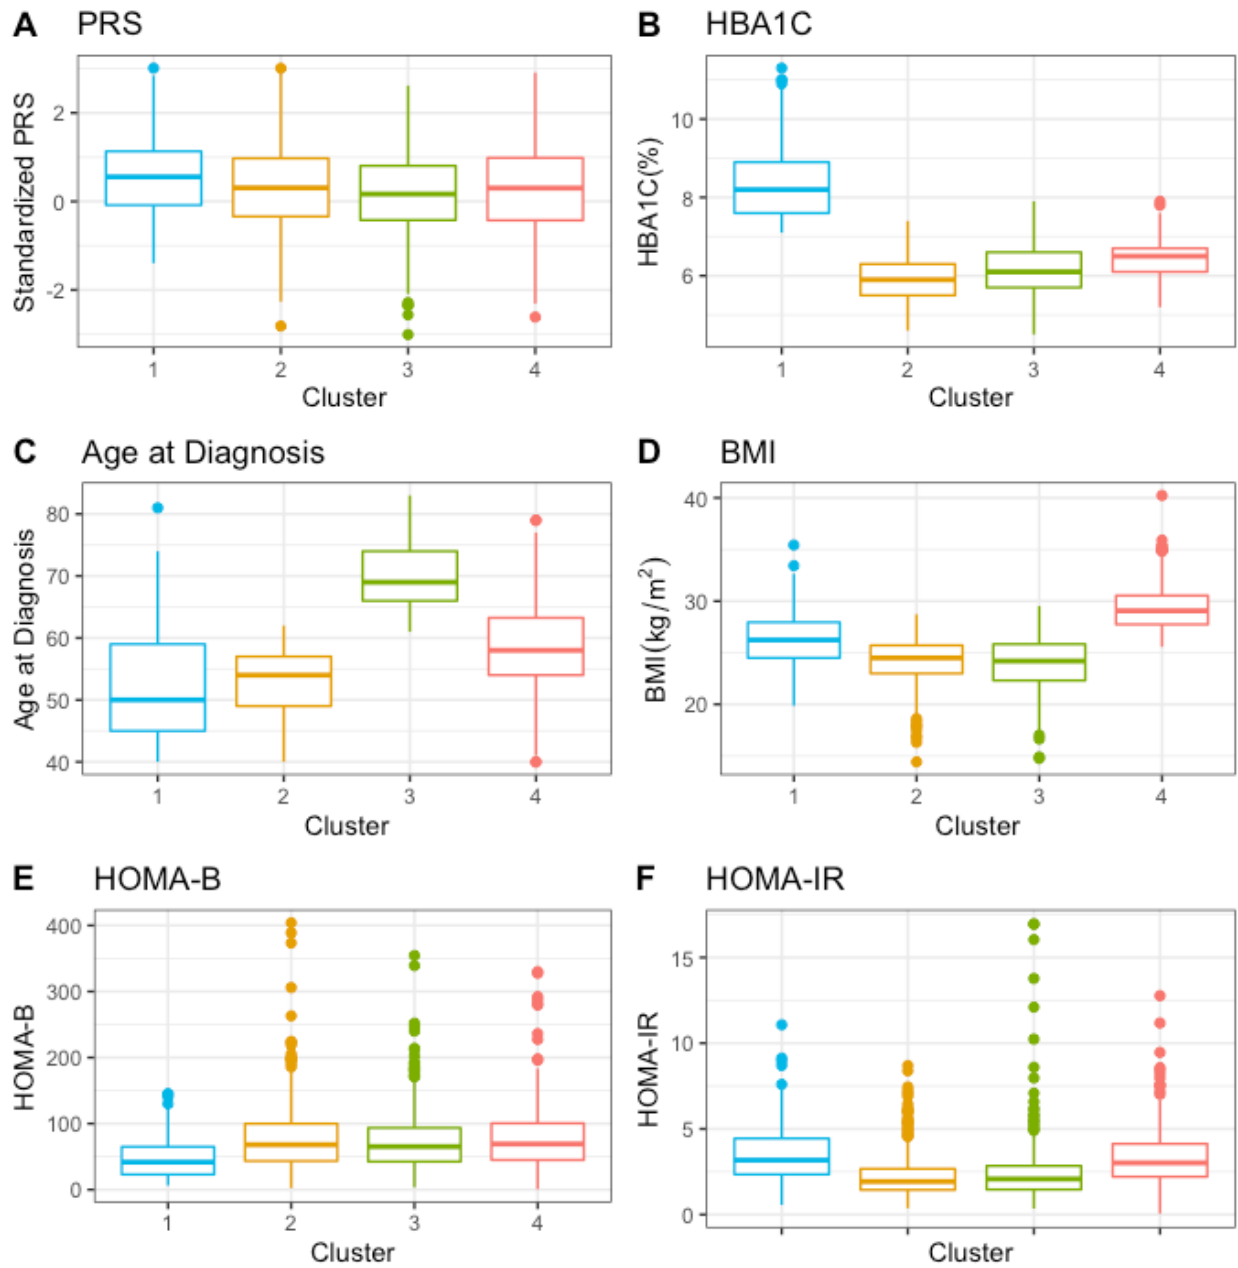

## Supplementary Tables

**Supplementary Table S1** Area under the receiver operating characteristics curve (AUC) of different methods

|                 | <b>T2DM ~ PRS</b> | <b>T2DM ~ PRS + sex + age</b> |
|-----------------|-------------------|-------------------------------|
| <b>Lassosum</b> | 0.64859           | 0.67599                       |
| <b>PRS-CS</b>   | 0.64766           | 0.67691                       |

**Supplementary Table S2** Dropout rate of Participants of Koges\_Anсан and Ansong dataset

| <b>Follow-up</b>        | <b>Baseline</b> | <b>1st</b> | <b>2nd</b> | <b>3rd</b> | <b>4th</b> | <b>5th</b> | <b>6th</b> | <b>7th</b> |
|-------------------------|-----------------|------------|------------|------------|------------|------------|------------|------------|
| <b>Dropout Rate (%)</b> | 0               | 5.14       | 10.66      | 15.12      | 14.48      | 15.45      | 17.81      | 11.57      |



**Supplementary Table S3** Cumulative prevalence of T2DM for baseline and each follow-up of Koges\_Ansan and Ansung dataset

| <b>Follow-up</b>   | <b>Baseline</b> | <b>1st</b> | <b>2nd</b> | <b>3rd</b> | <b>4th</b> | <b>5th</b> | <b>6th</b> | <b>7th</b> |
|--------------------|-----------------|------------|------------|------------|------------|------------|------------|------------|
| <b>NGT</b>         | 2572            | 2539       | 1821       | 1351       | 975        | 838        | 711        | 600        |
| <b>Prediabetes</b> | 2172            | 2015       | 2544       | 2832       | 3043       | 3039       | 3048       | 2995       |
| <b>Diabetes</b>    | 746             | 936        | 1125       | 1307       | 1472       | 1613       | 1731       | 1895       |

**Supplementary Table S4** Results of Cox regression analysis for cumulative prevalence of T2DM by PRS group

| <b>PRS</b>             | <b>Hazard Ratio</b> | <b>95% CI</b>       | <b>P-value</b>  |
|------------------------|---------------------|---------------------|-----------------|
| <b>Categorized PRS</b> |                     |                     |                 |
| Bottom Decile          | 0.45                | <i>0.36 – 0.56</i>  | <i>2.84E-13</i> |
| Middle (10-90%)        | 1.00<br>(reference) |                     |                 |
| Top Decile             | 2.290               | <i>12.02 – 2.59</i> | <i>2.00E-16</i> |

In the Cox regression model, sex was included as a predictor.

**Supplementary Table S5** Results of Cox regression analysis for predicting T2DM complication

| <b>T2DM Complications</b>          | <b>PRS</b>              | <b>Hazard Ratio</b> | <b>95% CI</b>  | <b>P-value</b> |
|------------------------------------|-------------------------|---------------------|----------------|----------------|
| <b>Macrovascular Complications</b> | <b>Categorized PRS</b>  |                     |                |                |
|                                    | Bottom Decile           | 0.6047              | 0.2233 – 1.637 | 0.322          |
|                                    | Middle (10-90%)         | 1.00<br>(reference) |                |                |
|                                    | Top Decile              | 0.7980              | 0.5325 – 1.196 | 0.275          |
|                                    | <b>Standardized PRS</b> | 0.9816              | 0.8415 – 1.145 | 0.813          |
| <b>Nephropathy</b>                 | <b>Categorized PRS</b>  |                     |                |                |
|                                    | Bottom Decile           | 0.9122              | 0.4675 – 1.780 | 0.788          |
|                                    | Middle (10-90%)         | 1.00<br>(reference) |                |                |
|                                    | Top Decile              | 0.8548              | 0.6197 – 1.179 | 0.339          |
|                                    | <b>Standardized PRS</b> | 0.9177              | 0.8110 – 1.038 | 0.173          |

specified as macrovascular complications and nephropathy

Macrovascular complications include myocardial infarction, coronary artery disease, congestive heart failure, cerebrovascular disease, peripheral artery disease.

**Supplementary Table S6** Characteristics at the baseline of the KoGES\_Anсан and Anսung non-diabetic population dataset

|                              | <b>PRS<br/>Bottom Decile<br/>(n = 348)</b> | <b>Middle<br/>(10-90%)<br/>(n = 2075)</b> | <b>PRS<br/>Top Decile<br/>(n = 149)</b> | <b>P-value</b> |
|------------------------------|--------------------------------------------|-------------------------------------------|-----------------------------------------|----------------|
| <b>Basic Information</b>     |                                            |                                           |                                         |                |
| Male (%)                     | 173 (49.71)                                | 941 (45.35)                               | 66 (44.30)                              | 0.295          |
| Age (year)                   | 50.73 ± 8.24                               | 49.69 ± 8.46                              | 48.61 ± 7.41                            | 0.014          |
| <b>Physical Measurements</b> |                                            |                                           |                                         |                |
| BMI (kg/m <sup>2</sup> )     | 24.08 ± 2.89                               | 24.10 ± 2.87                              | 24.41 ± 2.80                            | 0.424          |
| SBP (mmHg)                   | 117.62 ± 16.03                             | 117.98 ± 17.07                            | 118.74 ± 18.08                          | 0.796          |
| DBP (mmHg)                   | 79.03 ± 10.74                              | 78.85 ± 11.41                             | 79.03 ± 11.85                           | 0.95           |
| <b>Clinical Risk Factors</b> |                                            |                                           |                                         |                |
| HDL (mg/dL)                  | 50.07 ± 11.75                              | 50.48 ± 11.69                             | 50.01 ± 11.39                           | 0.764          |
| LDL (mg/dL)                  | 115.64 ± 30.30                             | 115.72 ± 31.63                            | 115.55 ± 29.62                          | 0.997          |
| TG (mg/dL)                   | 133.18 ± 81.57                             | 152.93 ± 111.57                           | 126.77 ± 61.24                          | 0.759          |
| Fasting Glucose (mg/dL)      | 84.29 ± 11.47                              | 131.97 ± 93.41                            | 87.20 ± 7.00                            | 6.06e-05       |
| Fasting Insulin (μIU/mL)     | 7.05 ± 3.58                                | 7.29 ± 4.76                               | 7.74 ± 7.61                             | 0.348          |
| HbA1C (%)                    | 5.29 ± 0.32                                | 5.34 ± 0.22                               | 5.34 ± 0.22                             | 0.00719        |
| <b>Others</b>                |                                            |                                           |                                         |                |
| Current Smoking (%)          | 89 (25.58)                                 | 460 (22.17)                               | 30 (20.13)                              | 0.254          |
| Family History (%)           | 21 (6.03)                                  | 200 (9.64)                                | 15 (10.07)                              | 0.091          |

BMI: Body Mass Index; SBP: Systolic Blood Pressure; DBP: Diastolic Blood Pressure; HDL:

High-Density Lipoprotein; LDL: Low-Density Lipoprotein; TG: Triglyceride. Obtained P-value

using one-way ANOVA analysis.
